# Supplementary material for: Using Behavioral Nudges to Engage Pregnant Women in a Smoking Cessation Trial: An Online Field Quasi-Experiment
Source: MDPI journal article supplement (doi:10.3390/healthcare8040531), 2020-12-02
Supplement: s1 [file s1]

## Supplementary Material S1: Before and after versions of RCT's Facebook Ads and web interface\*

\*The original text in these figures was in Romanian.

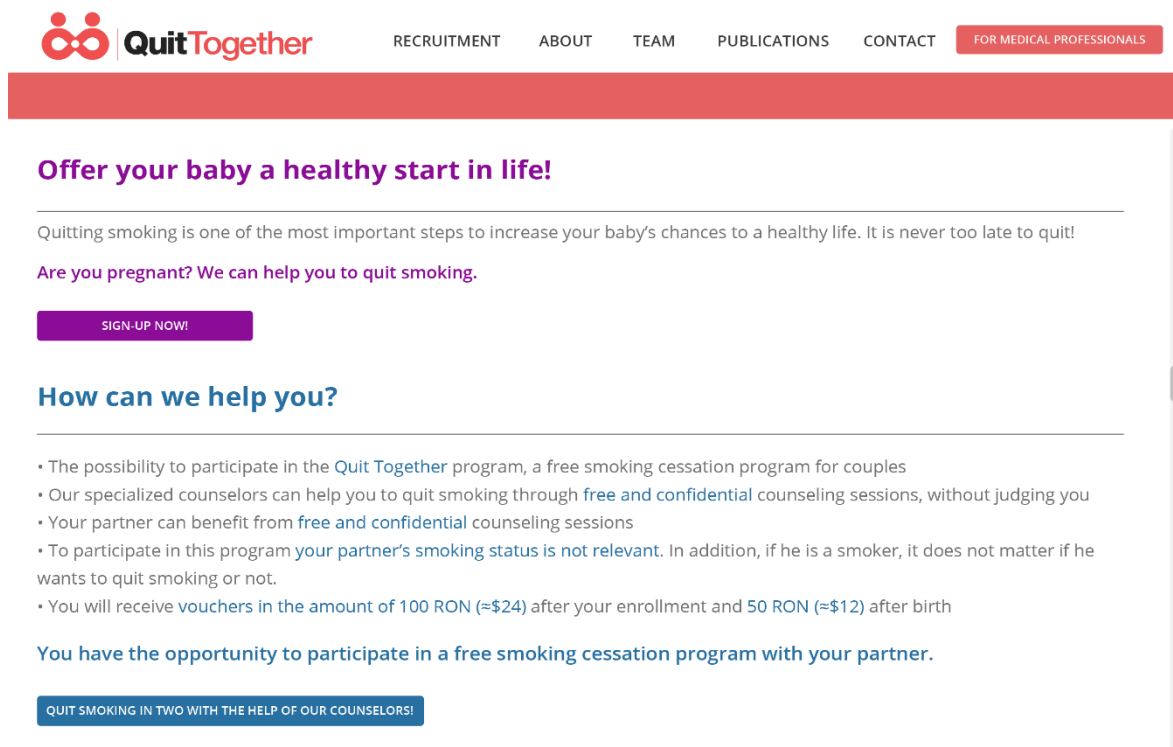

**Figure S1.** Screenshot of the Quit Together RCT's enrollment webpage depicting two value propositions.

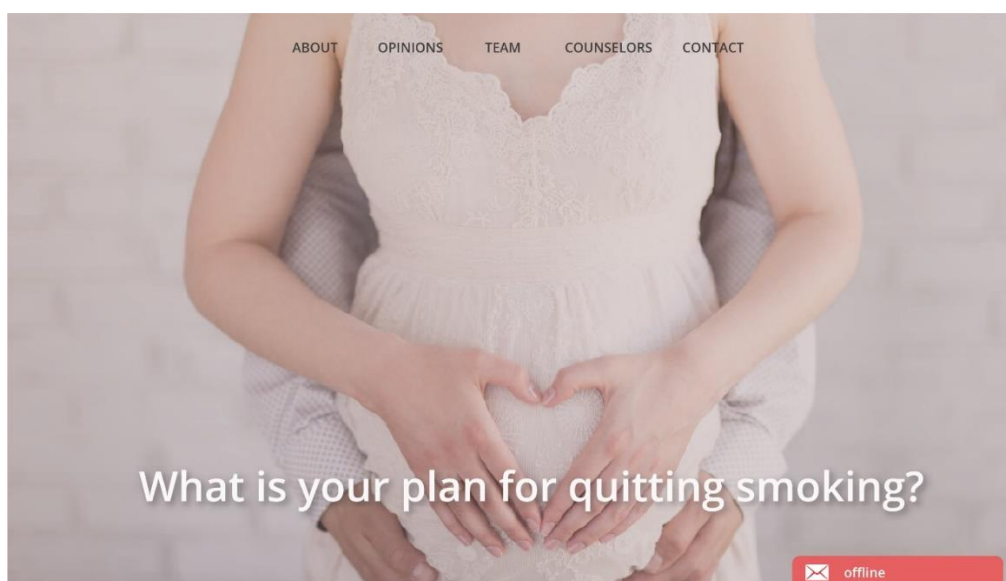

**Figure S2.** The new landing page of the Quit Together website (with live-chat feature included).

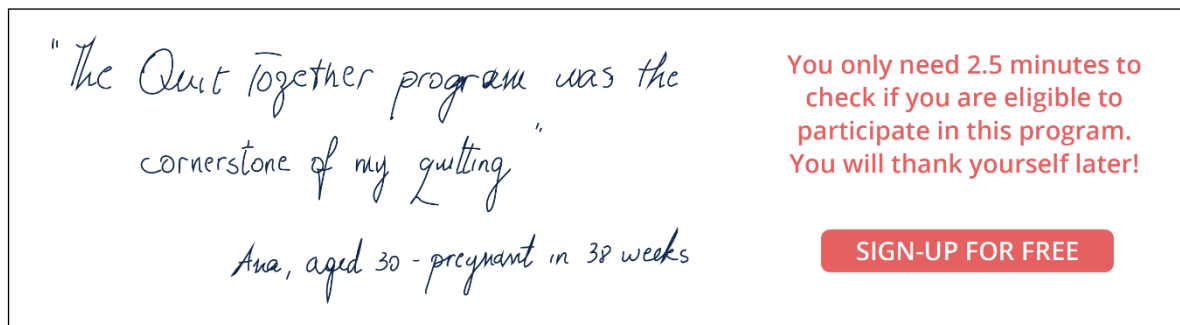

**Figure S3.** Testimonial of RCT participant and enrollment prompt posted on the Quit Together website.

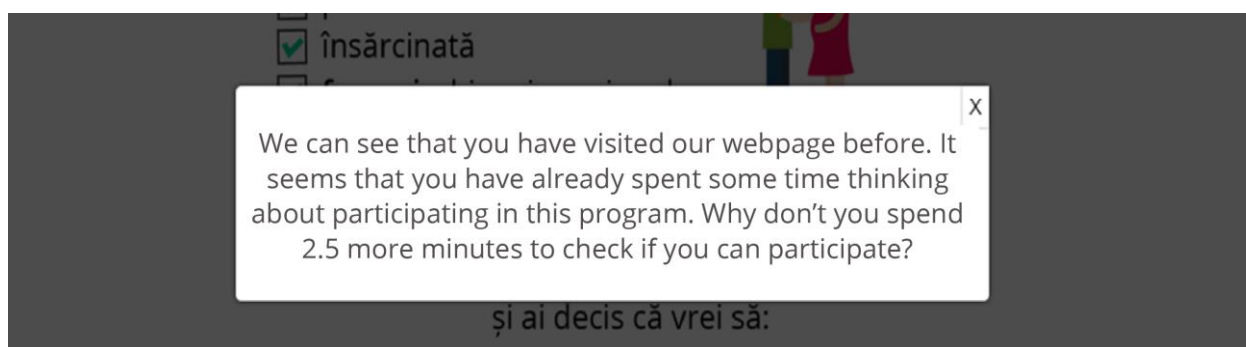

**Figure S4.** Pop-up message for returning visitors on the Quit Together website.

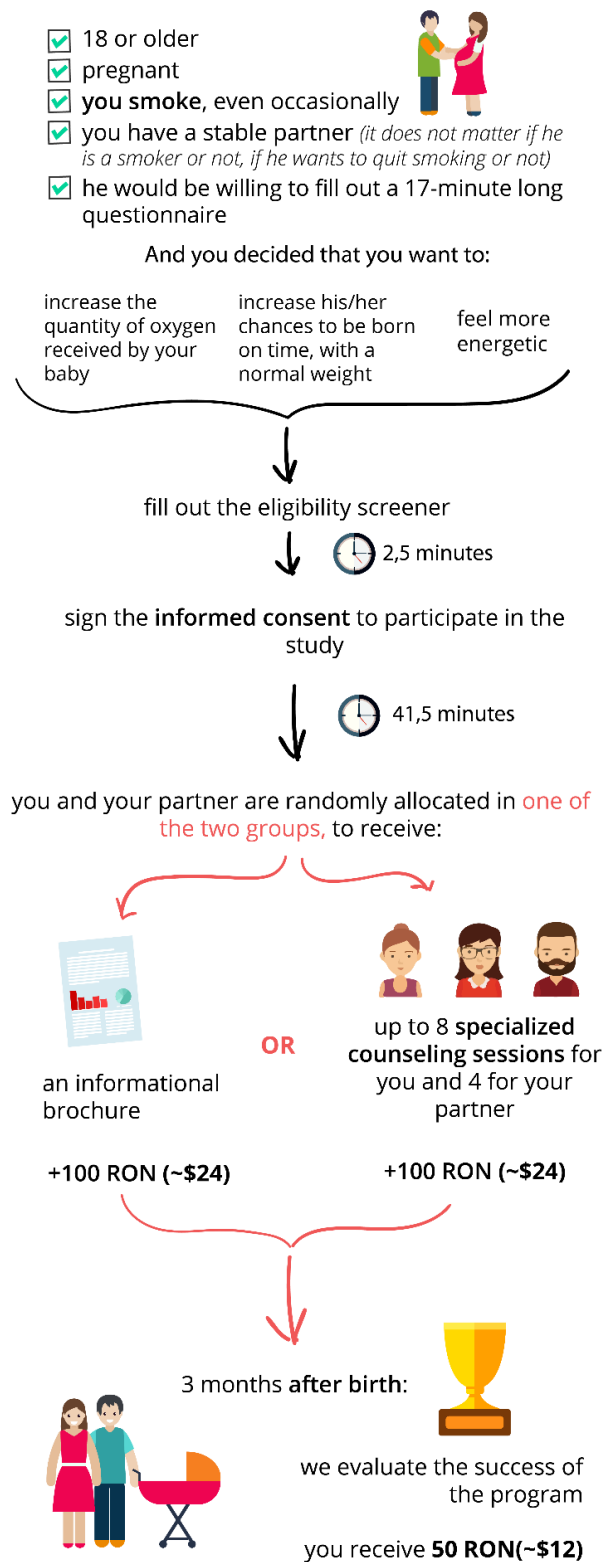

**Figure S5.** Infographic on the participation in the Quit Together RCT as posted on the website.

**Cluj School of Public Health** Sponsored ·   

Over 2000 future moms have already visited our website and learned more about the Quit Together program.  
Why not find out more about our free smoking cessation program?



publichealth.ro  
**Quit Together** [LEARN MORE](#)  
Confidential program. You will receive...

**Cluj School of Public Health** Sponsored ·   

It is very important for you to have a healthy baby and you would do anything for this. Quitting smoking you can protect him by many diseases, including asthma and other respiratory diseases. What is your plan for quitting smoking?



publichealth.ro  
**Quit Together** [LEARN MORE](#)  
Confidential program. You will receive...

**Cluj School of Public Health** Sponsored ·   

Maybe you smoked during a previous pregnancy and the baby was born healthy. Because all pregnancies and all babies are different, you won't know how smoking might affect this pregnancy.  
Visit our program's website to find out how you can quit smoking for free.



publichealth.ro  
**Quit Together** [LEARN MORE](#)  
Confidential program. You will receive...

**Cluj School of Public Health** Sponsored ·   

"The Quit Together program was the cornerstone of my quitting"  
(Ana, aged 30, pregnant in 38 weeks)  
Why not find out more about our free smoking cessation program?



publichealth.ro  
**Quit Together** [LEARN MORE](#)  
Confidential program. You will receive...

**Figure S6.** Quit Together Facebook ads developed based on behavioral economics insights.
